# Supplementary material for: Elatostema qinzhouense (Urticaceae), a new species from limestone karst in Guangxi, China
Source: PeerJ journal article supplement (doi:10.7717/peerj.11148), 2021-04-19
Supplement: Table_S1.xlsx [file Table_S1.xlsx]

## Sheet: Sheet1
Species names	Country	Voucher	Herbarium	Genbank accession numbers
				ITS	psbA-trnH	psbM-trnD
Debregeasia orientalis C.J.Chen	China	Y. H. Tseng 1310	TAI	KP858779	KP858772	KP858508
Elatostema acuteserratum B.L.Shih & Yuen P. Yang	China	Y. H. Tseng 1121	TAI	KP858860	KP858673	KP858600
Elatostema albopilosoides Q.Lin & L.D. Duan	China	Y. G. Wei & F. Wen 1083	IBK	KP858885	KP858722	KP858577
Elatostema androstachyum W.T.Wang, A.K.Monro & Y.G.Wei	China	Y. G. Wei g120	IBK	KP858871	KP858711	KP858575
Elatostema asterocephalum W.T.Wang	China	Y. G. Wei 0623	IBK	KP858878	KP858712	KP858533
Elatostema balansae Gagnep.	China	A. K. Monro & Y. G. Wei 6466	IBK	KP858847	KP858696	KP858559
Elatostema banahaense C.B.Rob.	Philippines	C. I. Peng 23770	HAST	KP858815	KP858662	KP858592
Elatostema binatum W.T.Wang & Y.G.Wei	China	A. K. Monro & Y. G. Wei 6663	IBK	KP858895	KP858726	KP858518
Elatostema brachyodontum (Hand.-Mazz.) W.T.Wang	China	A. K. Monro & Y. G. Wei 6724	IBK	KP858888	KP858708	KP858557
Elatostema brachyodontum (Hand.-Mazz.) W.T.Wang	China	Z. Y. Liu 17767	MO	KP858889	KP858709	KP858573
Elatostema calcareum Merr.	Mariana Islands	R. C. M. Gregor 432	BM	KP858817	KP858650	KP858589
Elatostema cyrtandrifolium (Zoll. & Moritzi) Miq.	China	Y. H. Tseng 1139	TAI	KP858844	KP858700	KP858558
Elatostema cyrtandrifolium (Zoll. & Moritzi) Miq.	China	Y. H. Tseng 1169	TAI	KP858845	KP858700	KP858558
Elatostema dissectum Wedd.	Bhutan	A. J. C. Grierson & D. G. Long 3932	K	KP858832	KP858740	KP858607
Elatostema edule C.B.Rob.	China	Y. H. Tseng 1119	TAI	KP858818	KP858664	KP858591
Elatostema edule C.B.Rob.	China	Y. H. Tseng 1131	TAI	KP858819	KP858663	KP858590
Elatostema fengshanense W.T.Wang & Y.G.Wei	China	A. K. Monro & Y. G. Wei 6651	IBK	KP858848	KP858694	KP858530
Elatostema ficoides Wedd.	Vietnam	L. Averyanov et al. VH4850	MO	KP858870	KP858703	KP858522
Elatostema garrettii Yahara	Thailand	P. Suvarnakoses 38824	K	KP858849	KP858698	KP858535
Elatostema goudotianum Wedd.	Madagascar	S. Malcomber 1723	BM	KP858798	KP858749	KP858629
Elatostema grande (Wedd.) P.S.Green	Australia	I. R. Telfor 10363	K	KP858821	KP858598	KP858598
Elatostema grande (Wedd.) P.S.Green	Australia	J. MacGillivray s.n.	BM	KP858822	KP858656	KP858599
Elatostema grandidentatum W.T.Wang	Bhutan	A. J. C. Grierson & D. G. Long 1999	K	KP858833	KP858737	KP858608
Elatostema gyrocephalum W.T.Wang & Y.G.Wei	China	Y. G. Wei 07101	IBK	KP858886	KP858727	KP858570
Elatostema gyrocephalum W.T.Wang & Y.G.Wei var. pubicaule W.T.Wang & Y.G.Wei	China	Y. G. Wei 0650	IBK	KP858887	KP858728	KP858578
Elatostema hechiense W.T.Wang & Y.G.Wei	China	A. K. Monro & Y. G. Wei 6507	IBK	KP858875	KP858729	KP858537
Elatostema hezhouense W.T.Wang, Y.G.Wei & L.F.Fu	China	A. K. Monro & Y. G. Wei 6820	IBK	KP858881	KP858705	KP858538
Elatostema hirtellipedunculatum B.L.Shih & Yuen P.Yang	China	Y. H. Tseng 1123	TAI	KP858863	KP858671	KP858568
Elatostema hookerianum Wedd.	China	Y. G. Wei 07	IBK	KP858904	KP858735	KP858605
Elatostema hypoglaucum B.L.Shih & Yuen P.Yang	China	Y. H. Tseng 1190	TAI	KP858891	KP858718	KP858516
Elatostema incisum Wedd.	Madagascar	G. E. Schatx et al. 3459	MO	KP858799	KP858750	KP858630
Elatostema insulare A.C.Sm.	Fiji	A. C. Smith 8145	K	KP858839	KP858681	KP858554
Elatostema integrifolium (D. Don) Wedd.	Solomon Islands	E. S. Brown 1484	BM	KP858852	KP858676	KP858549
Elatostema integrifolium (D. Don) Wedd.	Papua New Guinea	E. J. Conn et al. 5009	K	KP858853	KP858677	KP858553
Elatostema involucratum Franch. & Sav.	Japan	Tsugaru 30727	A	KP858866	KP858672	KP858574
Elatostema japonicum Wedd.	Japan	G. Murata 72870	KYO	KP858867	KP858715	KP858566
Elatostema kraemeri Reinecke	Samoa	K. L. Rechinger 1548	BM	KP858824	KP858657	KP858596
Elatostema laetevirens Makino	Japan	S. Tsugarul & T. Takahashi 25903	MO	KP858893	KP858683	KP858524
Elatostema laevissimum W.T.Wang	China	Y. G. Wei 06393	IBK	KP858861	KP858687	KP858562
Elatostema lineare Stapf	Malaysia	J & M. S. Clemens 50589	BM	KP858835	KP858713	KP858546
Elatostema lineolatum var. majus Wedd.	China	Y. H. Tseng 1108	TAI	KP858855	KP858689	KP858551
Elatostema lithoneurum Stapf	Malaysia	J & M. S. Clemens s.n.	BM	KP858827	KP858653	KP858588
Elatostema longistipulum Hand.-Mazz	China	A. K. Monro & Y. G. Wei 6462	IBK	KP858856	KP858679	KP858552
Elatostema lungzhouense W.T.Wang	China	A. K. Monro & Y. G. Wei 6786	IBK	KP858868	KP858716	KP858565
Elatostema lutescens C.B.Rob.	Philippines	C. B. Robinson 14004	BM	KP858816	KP858651	KP858585
Elatostema macintyrei Dunn	China	A. K. Monro & Y. G. Wei 6743	IBK	KP858850	KP858695	KP858560
Elatostema madagascariense Wedd.	Africa	Richard Razakamalala et al. 3199	MO	KP858800	KP858752	KP858631
Elatostema malacotrichum W.T.Wang & Y.G.Wei	China	Y. G. Wei 13	IBK	KP858876	KP858710	KP858544
Elatostema microcephalanthum Hayata	Japan	M. Furuse 4561	K	KP858873	KP858707	KP858556
Elatostema microcephalanthum Hayata	China	Y. H. Tseng 1100	TAI	KP858874	KP858706	KP858579
Elatostema monandrum (Buch.-Ham. ex D. Don) H.Hara	Nepal	F. Miyamoto et al. 9588281	MO	KP858905	KP858734	KP858606
Elatostema monticola Hook.f.	Congo	H. A. Osmaston 1952	BM	KP858803	KP858690	KP858628
Elatostema morobense L.M.Perry	Indonesia	R. J. Johns 9209A	K	KP858820	KP858661	KP858593
Elatostema multicaule W.T.Wang Y.G.Wei & L.F.Fu	China	A. K. Monro & Y. G. Wei 6748	IBK	KP858884	KP858685	KP858520
Elatostema myrtillus Hand.-Mazz.	China	Y. G. Wei 11_1	IBK	KP858880	KP858704	KP858523
Elatostema nasutum Hook.f.	China	A. K. Monro & Y. G. Wei 6401	IBK	KP858902	KP858741	KP858603
Elatostema oblongifolium Fu	China	A. K. Monro & Y. G. Wei 6713	IBK	KP858897	KP858724	KP858545
Elatostema oblongifolium Fu	China	Y. H. Tseng 1150	TAI	KP858898	KP858723	KP858526
Elatostema obtusum Wedd.	China	Boufford et al. 27415	A	KP858901	KP858739	KP858513
Elatostema obtusum Wedd. var. trilobulatum (Hayata) W.T.Wang	China	Y. H. Tseng 1191	TAI	KP858900	KP858738	KP858515
Elatostema oligophlebium W.T.Wang, Y.G.Wei & L.F.Fu	China	Y. G. Wei g075	IBK	KP858877	KP858721	KP858548
Elatostema orientale Engl.	Zimbabwe	C. F. M. Synnerton 784	BM	KP858802	KP858753	KP858627
Elatostema paivaeanum Wedd.	Africa	Charles Doumenge 456	MO	KP858801	KP858751	KP858626
Elatostema paivaeanum Wedd.	Malawi	E. G. Chapman 103	BM	KP858804	KP858754	KP858625
Elatostema penibukanense Gibbs	Malaysia	J. H. Beaman 10466	K	KP858854	KP858693	KP858542
Elatostema platyphyllum Wedd.	China	Y. H. Tseng 1107	TAI	KP858858	KP858678	KP858540
Elatostema pusillum C.B.Clarke ex Hook.f.	Bhutan	R. Bedi 931	K	KP858906	KP858736	KP858602
Elatostema qinzhouense L.F.Fu, A.K.Monro & Y.G.Wei	China	B. Pan & H.S. Ma P1184	IBK	MW172522*	MW172521*	MW172521*
Elatostema reticulatum Wedd.	Australia	P. I. Forster 7564	K	KP858834	KP858714	KP858555
Elatostema samoense Reinecke	Samoa	K. L. Rechinger s.n.	BM	KP858826	KP858660	KP858594
Elatostema serra H.J.P. Winkl.	Papua New Guinea	W. Takeuchi et al. 19898	MO	KP858837	KP858720	KP858534
Elatostema sinense H.Schröet.	China	T. T. Chen s.n.	-	KP858797	KP858747	KP858619
Elatostema sinense H.Schröet. var. longicornutum (H.Schröet.) W.T.Wang	China	Q. Shao & L. D. Duan 76	BM	KP858795	KP858745	KP858622
Elatostema sinense H.Schröet. var. xinningense (W.T.Wang) L.D.Duan & Q.Lin	China	Q. Shao & L. D. Duan 1 (BM	PE	KP858796	KP858746	KP858621
Elatostema sinopurpureum W.T.Wang	China	Y. G. Wei & F. Wen 1081	IBK	KP858869	KP858686	KP858532
Elatostema sp	Philippines	E. D. Merrill 5269	BM	KP858851	KP858675	KP858547
Elatostema sp	Malaysia	JMH_2016	BM	KP858836	KP858719	KP858521
Elatostema sp	Indonesia	Y. H. Tseng 1279	TAI	KP858829	KP858648	KP858586
Elatostema sp	Indonesia	Y. H. Tseng 1285	TAI	KP858830	KP858652	KP858580
Elatostema sp	Indonesia	H. C. Robinson & C. B. Kloss 198	BM	KP858828	KP858654	KP858581
Elatostema sp	Philippines	C. I. Peng 23849	HAST	KP858859	KP858674	KP858601
Elatostema strictum Reinecke	Samoa	K. L. Rechinger 388	BM	KP858825	KP858658	KP858597
Elatostema strigillosum B.L.Shih & Yuen P.Yang	China	Y. H. Tseng 1209	TAI	KP858813	KP858667	KP858583
Elatostema strigillosum B.L.Shih & Yuen P.Yang	Philippines	C. I. Peng 23775	HAST	KP858814	KP858669	KP858584
Elatostema subcoriaceum B.L.Shih & Yuen P.Yang	China	Y. H. Tseng 1127	TAI	KP858894	KP858646	KP858539
Elatostema sublineare W.T.Wang	China	A. K. Monro & Y. G. Wei 6686	IBK	KP858882	KP858682	KP858514
Elatostema suzukii T.Yamaz.	Japan	M. Furuse 5379	K	KP858864	KP858666	KP858525
Elatostema suzukii T.Yamaz.	Japan	Yasuda 5170	KYO	KP858865	KP858665	KP858576
Elatostema tenuicaudatum W.T.Wang	China	Y. G. Wei & F. Wen 1050	IBK	KP858862	KP858688	KP858528
Elatostema tenuinerve W.T.Wang & Y.G.Wei	China	A. K. Monro & Y. G. Wei 6502	IBK	KP858896	KP858717	KP858572
Elatostema thalictroides Stapf	Malaysia	J. H. Beaman 7650	MO	KP858838	KP858680	KP858536
Elatostema tianeense W.T.Wang & Y.G.Wei	China	A. K. Monro & Y. G. Wei 6491	IBK	KP858879	KP858647	KP858569
Elatostema villosum B.L.Shih & Yuen P.Yang	China	Y. H. Tseng 1275	TAI	KP858812	KP858668	KP858582
Elatostema vittatum Hallier f.	Malaysia	J. H. Beaman 10976	K	KP858792	KP858763	KP858609
Elatostema welwitschii Engl.	Africa	G. Gobbo 862	MO	KP858840	KP858692	KP858543
Elatostema welwitschii Engl.	Angola	Welwitsch 6270	BM	KP858841	KP858691	KP858550
Elatostema xanthophyllum W.T.Wang	Vietnam	Y. G. Wei & V.T. Do VMN_CN24	IBK	KP858890	KP858702	KP858571
Elatostema yachaense W.T.Wang, Y.G.Wei & L.F.Fu	China	A. K. Monro & Y. G. Wei 6725	IBK	KP858883	KP858684	KP858519
Elatostema yakushimense Hatus.	Japan	Murata et al. 15490	A	KP858892	KP858670	KP858517
Elatostema yaoshanense W.T.Wang	China	F. Wen 070509A	IBK	KP858903	KP858742	KP858604
Elatostematoides australe (Wedd.)Y. H. Tseng, A. K. Monro, Y. G. Wei & J. M. Hu	Fiji	A. C. Smith 8131	K	KP858790	KP858732	KP858612
Elatostematoides filicoides (Seem.)Y. H. Tseng, A. K. Monro, Y. G. Wei & J. M. Hu	Fiji	H. B. R. Parham 235a	BM	KP858789	KP858731	KP858611
Elatostematoides fruticulosum (K. Schumann)Y. H. Tseng, A. K. Monro, Y. G. Wei & J. M. Hu	Solomon Island	L. S. Brass 2607	BM	KP858788	KP858733	KP858610
Lecanthus peduncularis (Royle) Wedd.	China	Y. H. Tseng 1300	TAI	KP858787	KP858645	KP858511
Pellionia acutidentata W.T.Wang	China	Q. Shao & L. D. Duan 62	BM	KP858777	KP858759	KP858638
Pellionia grijsii Hance	China	Y. H. Tseng 1167	TAI	KC420491	KC420504	KP858635
Pellionia heteroloba Wedd.	China	A. K. Monro & Y. G. Wei 6459	IBK	KP858806	KP858756	KP858634
Pellionia minima Makino	Japan	J. M. Hu 1787	TAI	KP858809	KP858757	KP858636
Pellionia radicans Wedd.	China	Y. H. Tseng 1168	TAI	KP858810	KP858758	KP858637
Pellionia radicans Wedd.	China	Y. G. Wei U_05	IBK	KP858811	KP858755	KP858632
Pellionia repens (Lour.) Merr.	China	L. F. Fu & S. L. Huang FL0071	IBK	KU161129	KU161131	KU161130
Pellionia retrohispida W.T.Wang	China	M. H. Li 6	BM	KP858808	KP858760	KP858639
Pellionia scabra Benth.	China	Y. H. Tseng1219	TAI	KC420492	KC420503	KP858624
Pellionia viridis C.H.Wright	China	H. G. Xu 1995364	MO	KP858805	KP858748	KP858633
Poikilospermum acuminatum (Trécul) Merr.	China	Y. H. Tseng 1140	TAI	KP858908	KP858644	KP858510
Procris archboldiana A.C.Sm.	Fiji	A. C. Smith 5987	K	KP858785	KP858769	KP858614
Procris crenata C.B.Rob.	China	Y. H. Tseng 1170	TAI	KP858782	KP858766	KP858616
Procris crenata C.B.Rob.	China	Shi 15115	A	KP858783	KP858767	KP858617
Procris frutescens Blume	Papua New Guinea	Takeuchi 8800	A	KP858781	KP858764	KP858618
Procris laevigata Blume	China	Y. H. Tseng 1138	TAI	KP858784	KP858765	KP858615
Procris montana (Endl.) Steud.	Australia	R. O. Gardenr 5955	MO	KP858786	KP858768	KP858613
